# Supplementary material
Source: HighWire-hosted journal article supplement (https://www.annfammed.org/highwire/filestream/8744/field_highwire_adjunct_files/0/AAFP_SuppFig_Fam-Med-Positions920.pdf)
Supplement: AAFP_SuppFig_Fam-Med-Positions920.pdf [file AAFP_SuppFig_Fam-Med-Positions920.pdf]

## Family Medicine Positions Offered and Filled in March 2006-2016

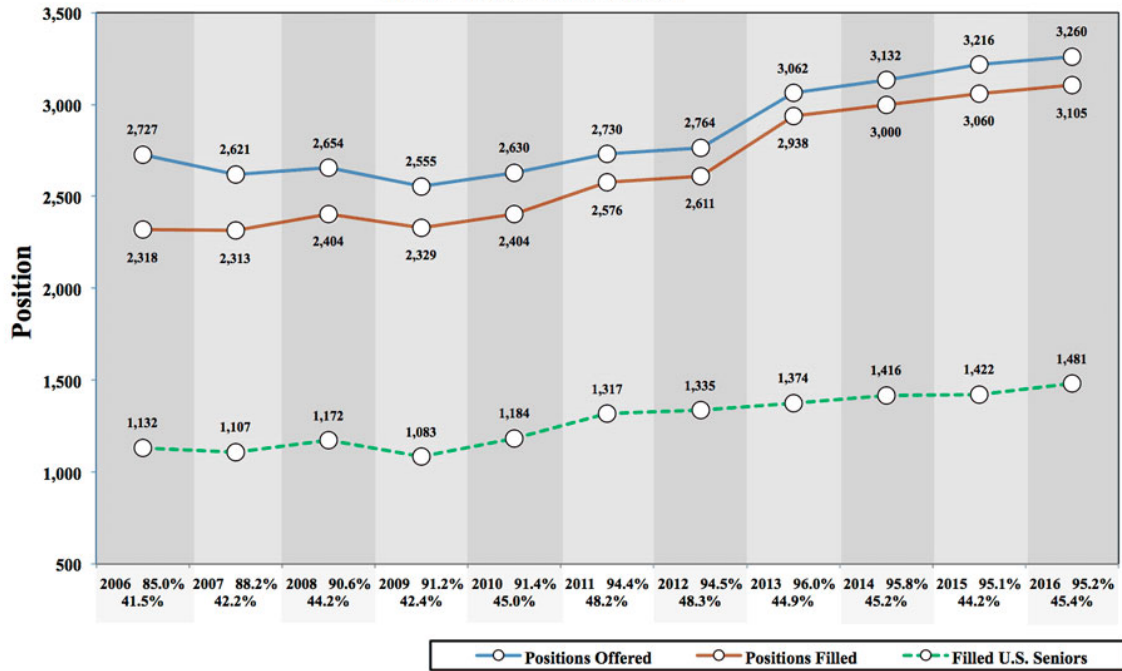

Source: National Resident Matching Program®  
Advance Data Tables 2016
